# Supplementary material for: Systematic analysis of Plasmodium myosins reveals differential expression, localisation, and function in invasive and proliferative parasite stages
Source: PubMed Central journal article supplement (PMC6851706; doi:10.1111/cmi.13082), 2019-07-23

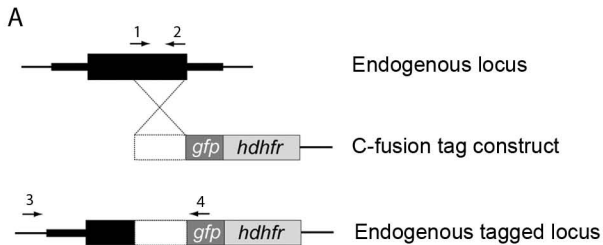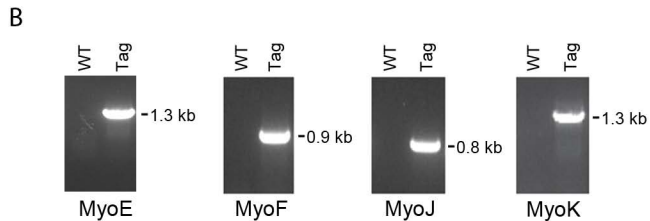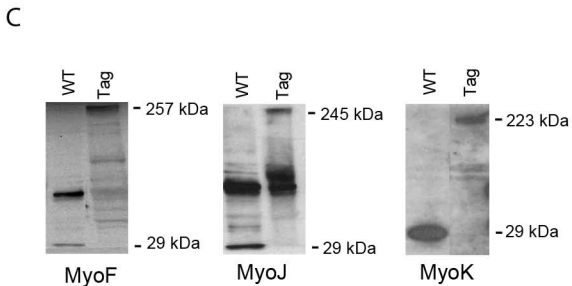

**D**

|          | Molecular weight | Unique peptide | Protein coverage |
|----------|------------------|----------------|------------------|
| MyoE-GFP | 228 kDa          | 67             | 41%              |

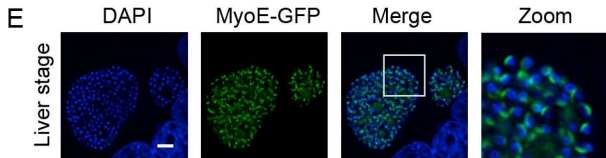

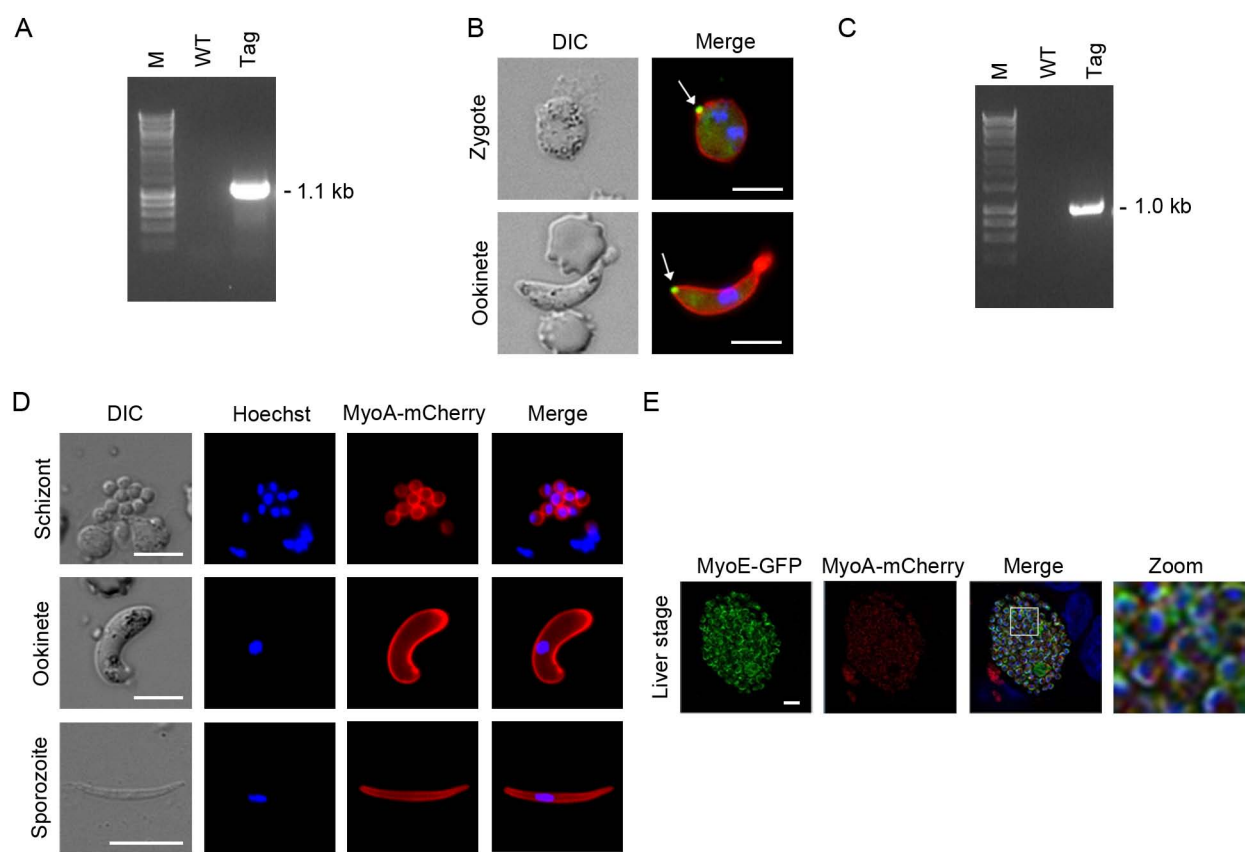

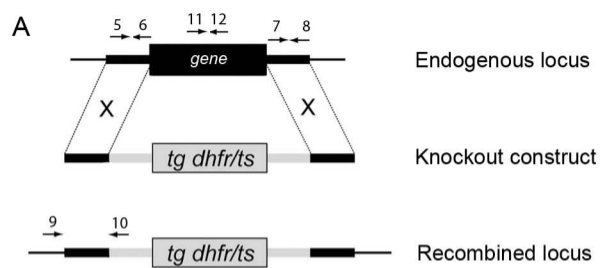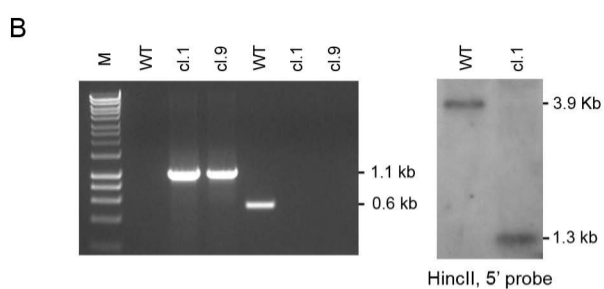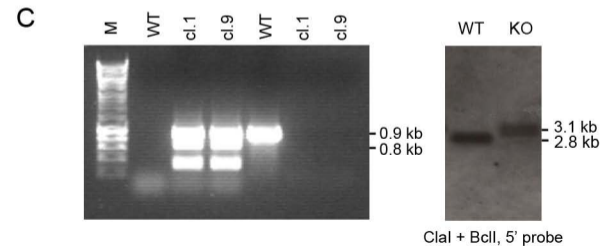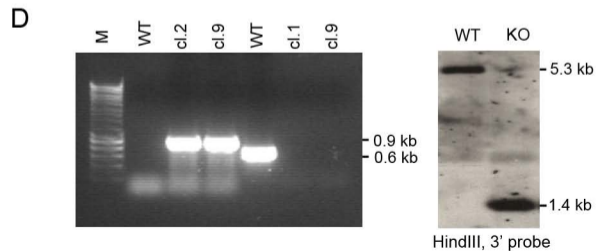

Supplement: CMI-21-na-s007.pdf [file CMI-21-na-s007.pdf]
